# Supplementary material for: Modulating the ESIPT Mechanism and Luminescence Characteristics of Two Reversible Fluorescent Probes by Solvent Polarity: A Novel Perspective
Source: MDPI journal article supplement (doi:10.3390/molecules29071629), 2024-04-05
Supplement: s1 [file s1]

## **Supplementary Material**

# **Modulating the ESIPT Mechanism and Luminescence Characteristics of Two Reversible Fluorescent Probes by Solvent Polarity: A Novel Perspective**

**Yang Wang, Hongyan Mu, Yuhang Sun, Jiaan Gao, Xiaodong Zhu and Hui Li \***

Jilin Key Laboratory of Solid-State Laser Technology and Application, School of Physics, Changchun University of Science and Technology, Changchun 130022, China; wy318321@163.com (Y.W.); xuemuafm@163.com (H.M.); 13136853259@163.com (Y.S.); gja13622147194@163.com (J.G.); zhu1013288433@163.com (X.Z.)

\* Correspondence: huili@cust.edu.cn; Tel./Fax: +86-431-85582465

**Table S1.** Bond length (Å), bond angles and dihedral angles (°) of HTP-1 and HTP-2 in different electron states.

|       |          |                  | O <sub>1</sub> -H <sub>1</sub> | N <sub>1</sub> -H <sub>1</sub> | δ(O <sub>1</sub> -H <sub>1</sub> -N <sub>1</sub> ) | C <sub>5</sub> -C <sub>1</sub> -C <sub>2</sub> -C <sub>3</sub> | C <sub>1</sub> -C <sub>2</sub> -C <sub>3</sub> -C <sub>4</sub> | C <sub>2</sub> -C <sub>1</sub> -C <sub>5</sub> -C <sub>6</sub> | C <sub>2</sub> -C <sub>1</sub> -C <sub>7</sub> -C <sub>8</sub> | C <sub>1</sub> -C <sub>2</sub> -C <sub>9</sub> -C <sub>10</sub> |
|-------|----------|------------------|--------------------------------|--------------------------------|----------------------------------------------------|----------------------------------------------------------------|----------------------------------------------------------------|----------------------------------------------------------------|----------------------------------------------------------------|-----------------------------------------------------------------|
| HTP-1 | ACN      | S <sub>0</sub>   | 0.997                          | 1.707                          | 147.79                                             | 12.35                                                          | 48.40                                                          | 47.66                                                          | 47.34                                                          | 47.62                                                           |
|       |          | S <sub>1</sub>   | 0.997                          | 1.709                          | 148.12                                             | 58.67                                                          | 17.02                                                          | 21.07                                                          | 24.06                                                          | 28.03                                                           |
|       | ACE      | S <sub>0</sub>   | 0.997                          | 1.708                          | 147.74                                             | 12.34                                                          | 48.37                                                          | 47.64                                                          | 47.28                                                          | 47.56                                                           |
|       |          | S <sub>1</sub>   | 0.997                          | 1.711                          | 148.07                                             | 53.66                                                          | 18.37                                                          | 21.59                                                          | 25.17                                                          | 27.97                                                           |
|       | DCM      | S <sub>0</sub>   | 0.997                          | 1.711                          | 147.63                                             | 12.32                                                          | 48.30                                                          | 47.58                                                          | 47.09                                                          | 47.41                                                           |
|       |          | S <sub>1</sub>   | 0.996                          | 1.714                          | 147.94                                             | 52.75                                                          | 18.63                                                          | 21.63                                                          | 25.33                                                          | 27.85                                                           |
|       | n-Hexane | S <sub>0</sub>   | 0.995                          | 1.726                          | 147.08                                             | 12.24                                                          | 48.15                                                          | 47.13                                                          | 46.60                                                          | 46.89                                                           |
|       |          | S <sub>1</sub>   | 0.994                          | 1.727                          | 147.34                                             | 50.21                                                          | 19.12                                                          | 21.15                                                          | 25.86                                                          | 27.45                                                           |
|       | ACN      | S <sub>0</sub>   | 0.990                          | 1.775                          | 145.68                                             | 12.56                                                          | 47.76                                                          | 47.54                                                          | 47.31                                                          | 47.53                                                           |
|       |          | S <sub>1</sub>   | 0.999                          | 1.687                          | 146.60                                             | 20.22                                                          | 38.45                                                          | 40.82                                                          | 40.72                                                          | 43.38                                                           |
| HTP-2 | ACN      | S <sub>1</sub> ' | 1.881                          | 1.026                          | 126.13                                             | 12.63                                                          | 48.98                                                          | 48.54                                                          | 46.39                                                          | 46.40                                                           |
|       |          | S <sub>0</sub>   | 0.990                          | 1.776                          | 145.64                                             | 12.53                                                          | 47.82                                                          | 47.45                                                          | 47.26                                                          | 47.49                                                           |
|       | ACE      | S <sub>1</sub>   | 1.000                          | 1.685                          | 146.63                                             | 20.24                                                          | 38.42                                                          | 40.79                                                          | 40.65                                                          | 43.29                                                           |
|       |          | S <sub>1</sub> ' | 2.010                          | 1.022                          | 120.44                                             | 9.69                                                           | 50.46                                                          | 47.09                                                          | 47.22                                                          | 46.04                                                           |
|       | DCM      | S <sub>0</sub>   | 0.989                          | 1.778                          | 145.54                                             | 12.46                                                          | 47.92                                                          | 47.26                                                          | 47.12                                                          | 47.41                                                           |
|       |          | S <sub>1</sub>   | 1.000                          | 1.682                          | 146.71                                             | 20.32                                                          | 38.35                                                          | 40.66                                                          | 40.48                                                          | 43.10                                                           |
|       | n-Hexane | S <sub>1</sub> ' | 1.981                          | 1.023                          | 121.90                                             | 9.63                                                           | 50.93                                                          | 47.14                                                          | 46.96                                                          | 45.74                                                           |
|       |          | S <sub>0</sub>   | 0.988                          | 1.789                          | 145.10                                             | 12.23                                                          | 47.75                                                          | 46.87                                                          | 46.63                                                          | 47.29                                                           |
|       | n-Hexane | S <sub>1</sub>   | 1.003                          | 1.660                          | 147.13                                             | 20.75                                                          | 38.29                                                          | 40.16                                                          | 39.97                                                          | 42.35                                                           |
|       |          | S <sub>1</sub> ' | 1.886                          | 1.027                          | 126.50                                             | 9.90                                                           | 52.01                                                          | 47.31                                                          | 45.92                                                          | 44.83                                                           |

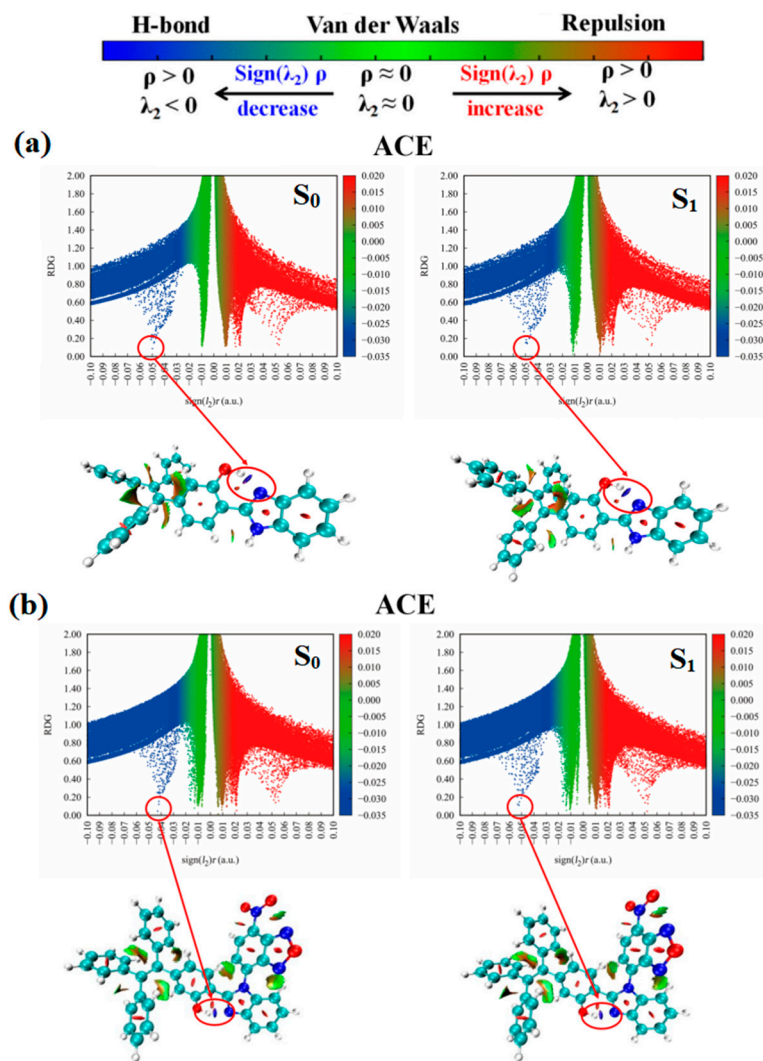

**Figure S1.** Reduced density gradient (RDG) versus  $X(r)$  scatter plots in ACE: (a) HTP-1, (b) HTP-2.

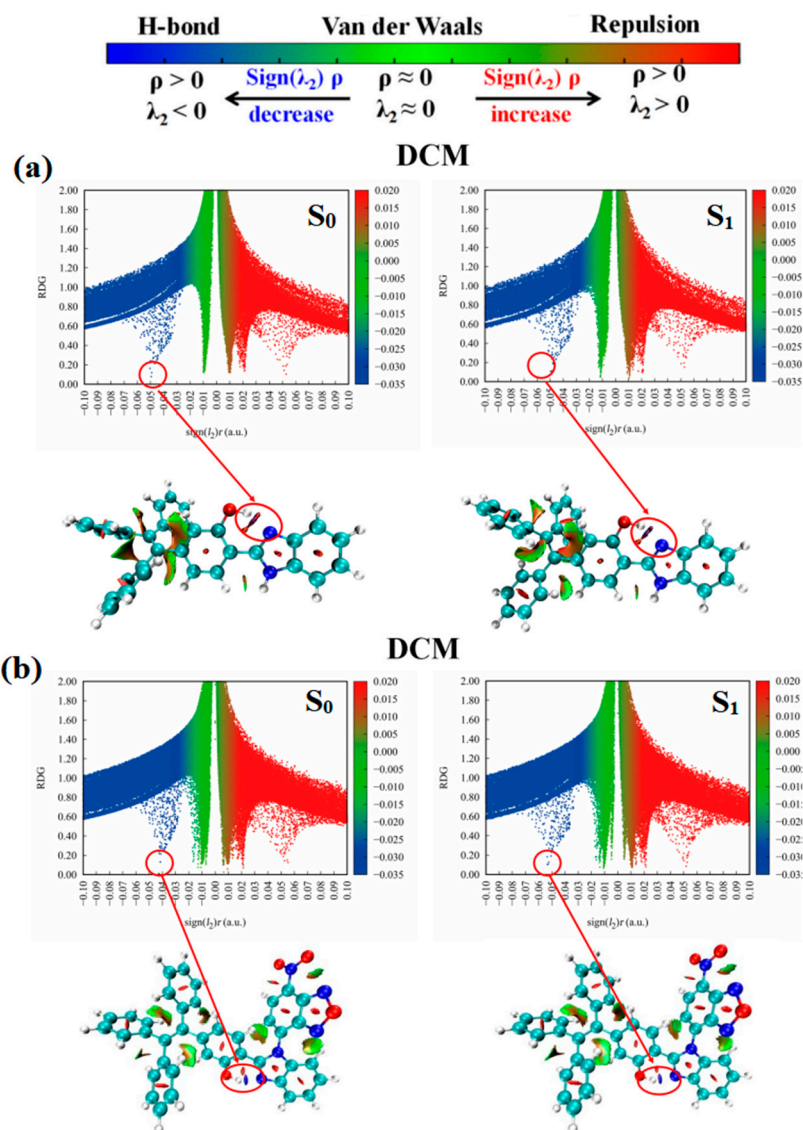

**Figure S2.** Reduced density gradient (RDG) versus  $X(r)$  scatter plots in DCM: (a) HTP-1, (b) HTP-2.

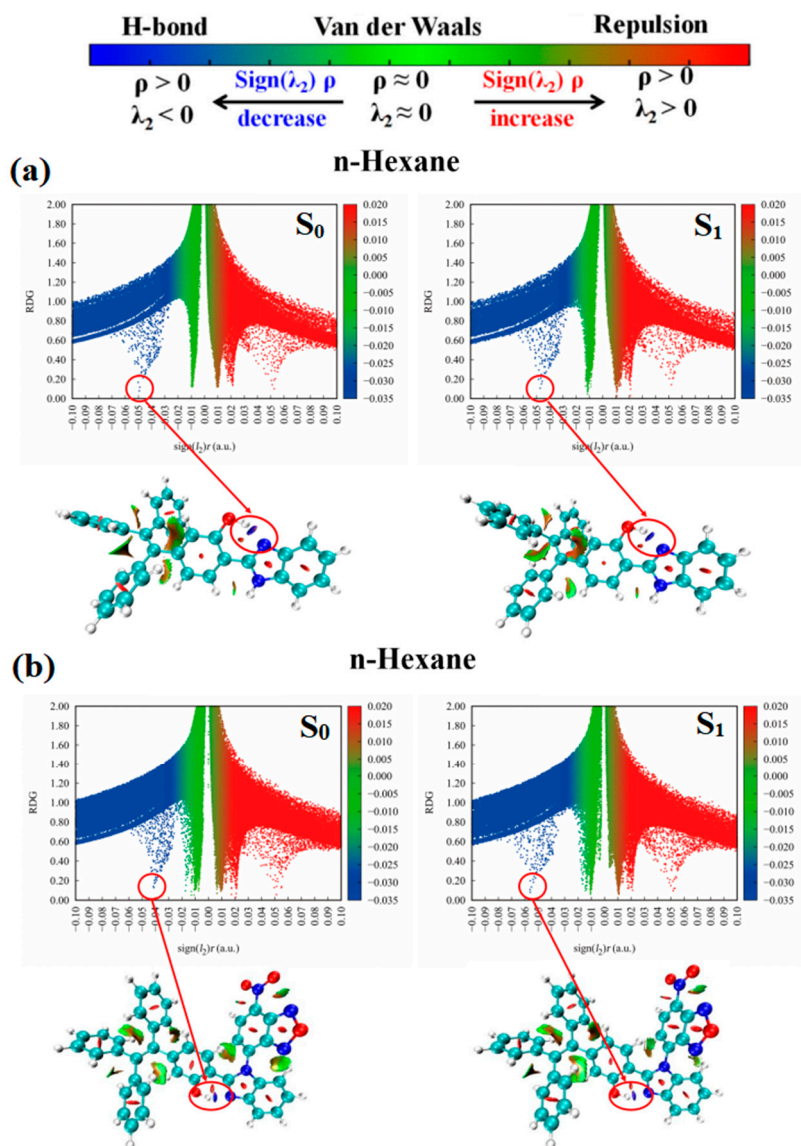

**Figure S3.** Reduced density gradient (RDG) versus  $X(r)$  scatter plots in n-Hexane: (a) HTP-1, (b) HTP-2.

**Table S2.** Dielectric constant and polarity of four solvents.

| Solvents | Dielectric constant | Polarity |
|----------|---------------------|----------|
| ACN      | 37.5                | 6.2      |
| ACE      | 20.7                | 5.4      |
| DCM      | 9.08                | 3.4      |
| n-Hexane | 1.58                | 0.06     |

**Table S3.** The experimental and theoretical data of absorption and emission spectra of HTP-1 and HTP-2 in four solvents.

|       |          | Exp. | Theor. |
|-------|----------|------|--------|
| HTP-1 | ACN      | 348  | 351    |
|       | DCM      | 360  | 352    |
|       | n-Hexane | 345  | 352    |
